# Supplementary material for: A SMRT approach for targeted amplicon sequencing of museum specimens (Lepidoptera)—patterns of nucleotide misincorporation
Source: PeerJ. 2021 Jan 14;9:e10420. doi: 10.7717/peerj.10420 (PMC7811786; doi:10.7717/peerj.10420)
Supplement: Supplemental Information 1 — The same set of sequence reads were aligned to various reference sequences ranging from closely to distantly related. The number of aligned reads and the resulting number of aligned base pairs are shown for each reference sequence. [file peerj-09-10420-s001.xlsx]

## Sheet: Sheet1
Taxonomy	Species	Relationship to sample	Distance (COI) from sample	Number aligned reads	Assembled sequence length (bp)
Coleoptera	Dalopius tristis	Same species	0.00610458	28964	658
Coleoptera	Dalopius asellus	Same genus	0.0375803	26797	658
Coleoptera	Dalopius marginatus	Same genus	0.0623236	20853	658
Coleoptera	Dalopius vagus	Same genus	0.0708051	16279	654
Coleoptera	Dalopius naomii	Same genus	0.0708051	13501	657
Coleoptera	Dalopius asellus	Same genus	0.0709697	17335	658
Coleoptera	Dalopius pallidus	Same genus	0.0774963	15457	658
Coleoptera	Agriotes avulsus	Same family	0.139328	6651	561
Coleoptera	Agriotes sordidus	Same family	0.144198	12203	432
Coleoptera	Agriotes obscurus	Same family	0.146096	5779	527
Coleoptera	Agriotes proximus	Same family	0.146178	9185	523
Coleoptera	Agriotes lineatus	Same family	0.146178	9618	427
Coleoptera	Agriotes acutus	Same family	0.149605	8659	615
Coleoptera	Agriotes brevis	Same family	0.150002	10481	501
Coleoptera	Agriotes tardus	Same family	0.150002	12015	392
Coleoptera	Agriotes limosus	Same family	0.155507	11046	395
Coleoptera	Agriotes ustulatus	Same family	0.157352	7967	589
Coleoptera	Agriotes quebecensis	Same family	0.159923	11023	396
Coleoptera	Agriotes pilosellus	Same family	0.161144	8919	534
Coleoptera	Agriotes stabilis	Same family	0.163395	9180	484
Coleoptera	Agriotes pubescens	Same family	0.163506	9854	604
Coleoptera	Agriotes acuminatus	Same family	0.16505	8293	395
Coleoptera	Agriotes mancus	Same family	0.165363	10026	489
Coleoptera	Agriotes apicalis	Same family	0.167118	6471	513
Coleoptera	Agriotes insanus	Same family	0.170967	7617	435
Coleoptera	Agriotes gallicus	Same family	0.17274	4741	210
Coleoptera	Agriotes sputator	Same family	0.173191	9312	492
Coleoptera	Agriotes pallidulus	Same family	0.178728	5921	465
Coleoptera	Agriotes fucosus	Same family	0.187097	7028	508
Coleoptera	Agriotes collaris	Same family	0.190787	7438	438
Coleoptera	Podeonius acuticornis	Same family	0.197565	3579	370
Coleoptera	Agriotes oblongicollis	Same family	0.198034	5056	395
Coleoptera	Mulsanteus arizonensis	Same family	0.242009	8	87
Coleoptera	Xyleborinus saxeseni	Same order	0.28178	5	98
Diptera	Drosophila melanogaster	Same class	0.201276	5709	459
Odonata	Gryllus campestris	Same class	0.203448	8417	330
Lepidoptera	Danaus plexippus	Same class	0.234255	3	150
Orthoptera	Tettigonia viridissima	Same class	0.257221	2176	149
Hemiptera	Acanthosoma haemorrhoidale	Same class	0.276275	1	106
Hymenoptera	Apis mellifera	Same class	0.387465	0	0
Arachnida	Opistophthalmus macer	Same phylum	0.396266	0	0
Crustacea	Homarus americanus	Same phylum	0.291239	2677	119
Amphibia	Rana sylvatica	Same kingdom	0.382604	0	0
Mammal	Castor canadensis	Same kingdom	0.397772	0	0
Fish	Oncorhynchus mykiss	Same kingdom	0.400611	0	0
Bird	Larus delawarensis	Same kingdom	0.401282	0	0
Jellyfish	Cyanea capillata	Same kingdom	0.437422	0	0
Reptile	Thamnophis sirtalis	Same kingdom	0.463318	0	0
