# Supplementary material for: A SMRT approach for targeted amplicon sequencing of museum specimens (Lepidoptera)—patterns of nucleotide misincorporation
Source: PeerJ. 2021 Jan 14;9:e10420. doi: 10.7717/peerj.10420 (PMC7811786; doi:10.7717/peerj.10420)
Supplement: Supplemental Information 2 — Asterisks indicate fresh samples. Rates in column I and row 16 are normalized with respect to GC composition. The total expected substitution rate was calculated following Eckert & Kunkel (1991) where coverage refers to the arithmetic mean of the read coverage for the six fragments spanning the barcode region. Errors induced by DNA decay were quantified by subtracting the substitution rate for fresh samples from the rate for museum samples. Values in brackets refer to the percentage of errors for a particular category of substitution. [file peerj-09-10420-s002.xlsx]

## Sheet: Sheet1
Species	Process IDs	Substitution rate								Coverage (reads)	GC composition (%)
		C/G → T/A	T/A → C/G	A/T → T/A	C/G → G/C	C/G → A/T	T/A → G/C	Total standardized	Total expected
Euchloe lotta	NGSFT3956-16	0.00200325	0.000886013	8.05466e-05	3.45387e-05	0.000138155	6.71222e-05	0.00135351	ND	227	28
Eurema daira	NGSFT3963-16	0.00292544	0.00101775	0.000188473	4.1792e-05	0.000292544	0.000150778	0.00194877	ND	165	31
Heliopetes laviana	NGSFT3869-16	0.00214666	0.000850787	0.00013922	7.66665e-05	0.00023	9.28132e-05	0.00147753	ND	199	29
Erynnis meridianus	NGSFT3828-16	0.00220022	0.00103791	0.000155091	2.5584e-05	0.000179088	9.54403e-05	0.00164347	ND	238	32
Amblyscirtes vialis	NGSFT3929-16	0.00123121	0.00103781	0.000139407	0	7.24244e-05	0.000108428	0.00129104	ND	195	30
Average museum samples		2.10E-03±2.70E-04	9.66E-04±4.04E-05	1.41E-04±1.75E-05	3.57E-05±1.24E-05	1.82E-04±3.77E-05	1.03E-05±1.37E-05	0.00154185	ND	204.8	30
Nymphalis antiopa*	JSPEC127-18	0.000543525	0.000772319	0.000135598	0	8.64699e-05	4.71645e-05	0.000850079	6E-04<X<1.2E-02	423	32
Cercyonis pegala*	JSPEC123-18	0.000536049	0.000832832	7.02388e-05	0	6.18518e-05	5.51876e-05	0.000840421		468	33
Glaucopsyche lygdamus*	JSPEC120-18	0.000685269	0.000795007	7.61684e-05	1.20223e-05	9.61781e-05	8.09289e-05	0.000907052		517	28
Limenitis arthemis*	JSPEC074-18	0.000617556	0.000933937	7.23048e-05	1.47037e-05	5.88149e-05	0.000102432	0.000987153		405	29
Pieris rapae*	JSPEC128-18	0.000470373	0.00083605	6.13104e-05	0	3.81383e-05	5.0163e-05	0.000813625		451	31
Average fresh samples		5.71E-04±3.70E-05	8.34E-04±2.77E-05	8.31E-05±1.33E-05	5.35E-06±3.30E-06	6.83E-05±1.04E-05	6.72E-05±1.06E-05	0.000879666		464.622	30
DNA-decay induced errors		1.53E-03±1.11E-04	1.32E-04±2.00E-05	5.74E-05±8.98E-06	3.04E-05±5.25E-06	1.14E-04±1.60E-05	3.75E-05±7.09E-06	6.63E-04±4.98E-05 (100%)
Standardized DNA-decay induced errors	error rate normalizzato su tutta la sequenza	4.58E-04±3.62E-05 (69%)	9.67E-05±1.33E-05 (15%)	4.06E-05±5.94E-06 (6%)	9.04E-06±1.51E-06 (1%)	3.41E-05±4.99E-06 (5%)	2.50E-05±4.94E-06 (4%)
