# Supplementary material for: A SMRT approach for targeted amplicon sequencing of museum specimens (Lepidoptera)—patterns of nucleotide misincorporation
Source: PeerJ. 2021 Jan 14;9:e10420. doi: 10.7717/peerj.10420 (PMC7811786; doi:10.7717/peerj.10420)
Supplement: Supplemental Information 3 — Rates for museum samples were compared against rates for fresh samples by category of substitution. [file peerj-09-10420-s003.xlsx]

## Sheet: Sheet1
Types of substitutions	P-value (two tails, 4 degrees of freedom)
C/G → T/A	0.007937
T/A → C/G	0.036
A/T → T/A	0.02118
C/G → G/C	0.067
C/G → A/T	0.032
T/A → G/C	0.095
