# Supplementary material for: A SMRT approach for targeted amplicon sequencing of museum specimens (Lepidoptera)—patterns of nucleotide misincorporation
Source: PeerJ. 2021 Jan 14;9:e10420. doi: 10.7717/peerj.10420 (PMC7811786; doi:10.7717/peerj.10420)
Supplement: Supplemental Information 23 [file peerj-09-10420-s023.xlsx]

## Sheet: Sheet1
	PacBio Sequel Systems	PacBio Sequel II Systems	Illumina MiSeq (Reagent Kit v3, 2 x 300bp chemistry)	Illumina NovaSeq (SP Reagent kit, 2 x 250bp chemistry)
Cost for sequencing kit (i.e. chip/flowcell, library preparation reagents, sequencing reagent)	$1100 CAD	$1500 CAD	$2700 CAD	$9000 CAD
Theoretical reads output	1M	8M	25M	700M
Effective reads output	400K Empirical evidence showed that about 40% of the total ZMWs deliver high accuracy reads (>99%). Such efficiency is explained because i) ca. 55% of the ZMWs failed to generate reads due to constitutional limitations of the sequencing technology and ii) ca. 5% of the reads are discarded after bioinformatic quality filtering.	4M Our estimate indicated that the improved sequencing accuracy allows the retention of a higher proportion of reads, when compared to PacBio Sequel (50% vs 40%).	15M Our estimate indicated that about 60% of the total capacity of the sequencer delivers high accuracy reads (>99%). Such efficiency is explained because i) ca. 25% of the Flow Cell is occupied by the Phix control library and ii) ca. 20% of the rest of the Flow Cell fails to generate reads due to suboptimal library preparation and bioinformatic quality filtering.	400M Our estimate indicated that the efficiency for NovaSeq is similar than what expected for MiSeq. About 60% of the total capacity of the sequencer delivers high accuracy (>99%) reads.
Effective cost per million reads	$2,750 CAD	$375 CAD	$180 CAD	$23 CAD
