# Supplementary material for: A SMRT approach for targeted amplicon sequencing of museum specimens (Lepidoptera)—patterns of nucleotide misincorporation
Source: PeerJ journal article supplement (doi:10.7717/peerj.10420), 2021-01-14

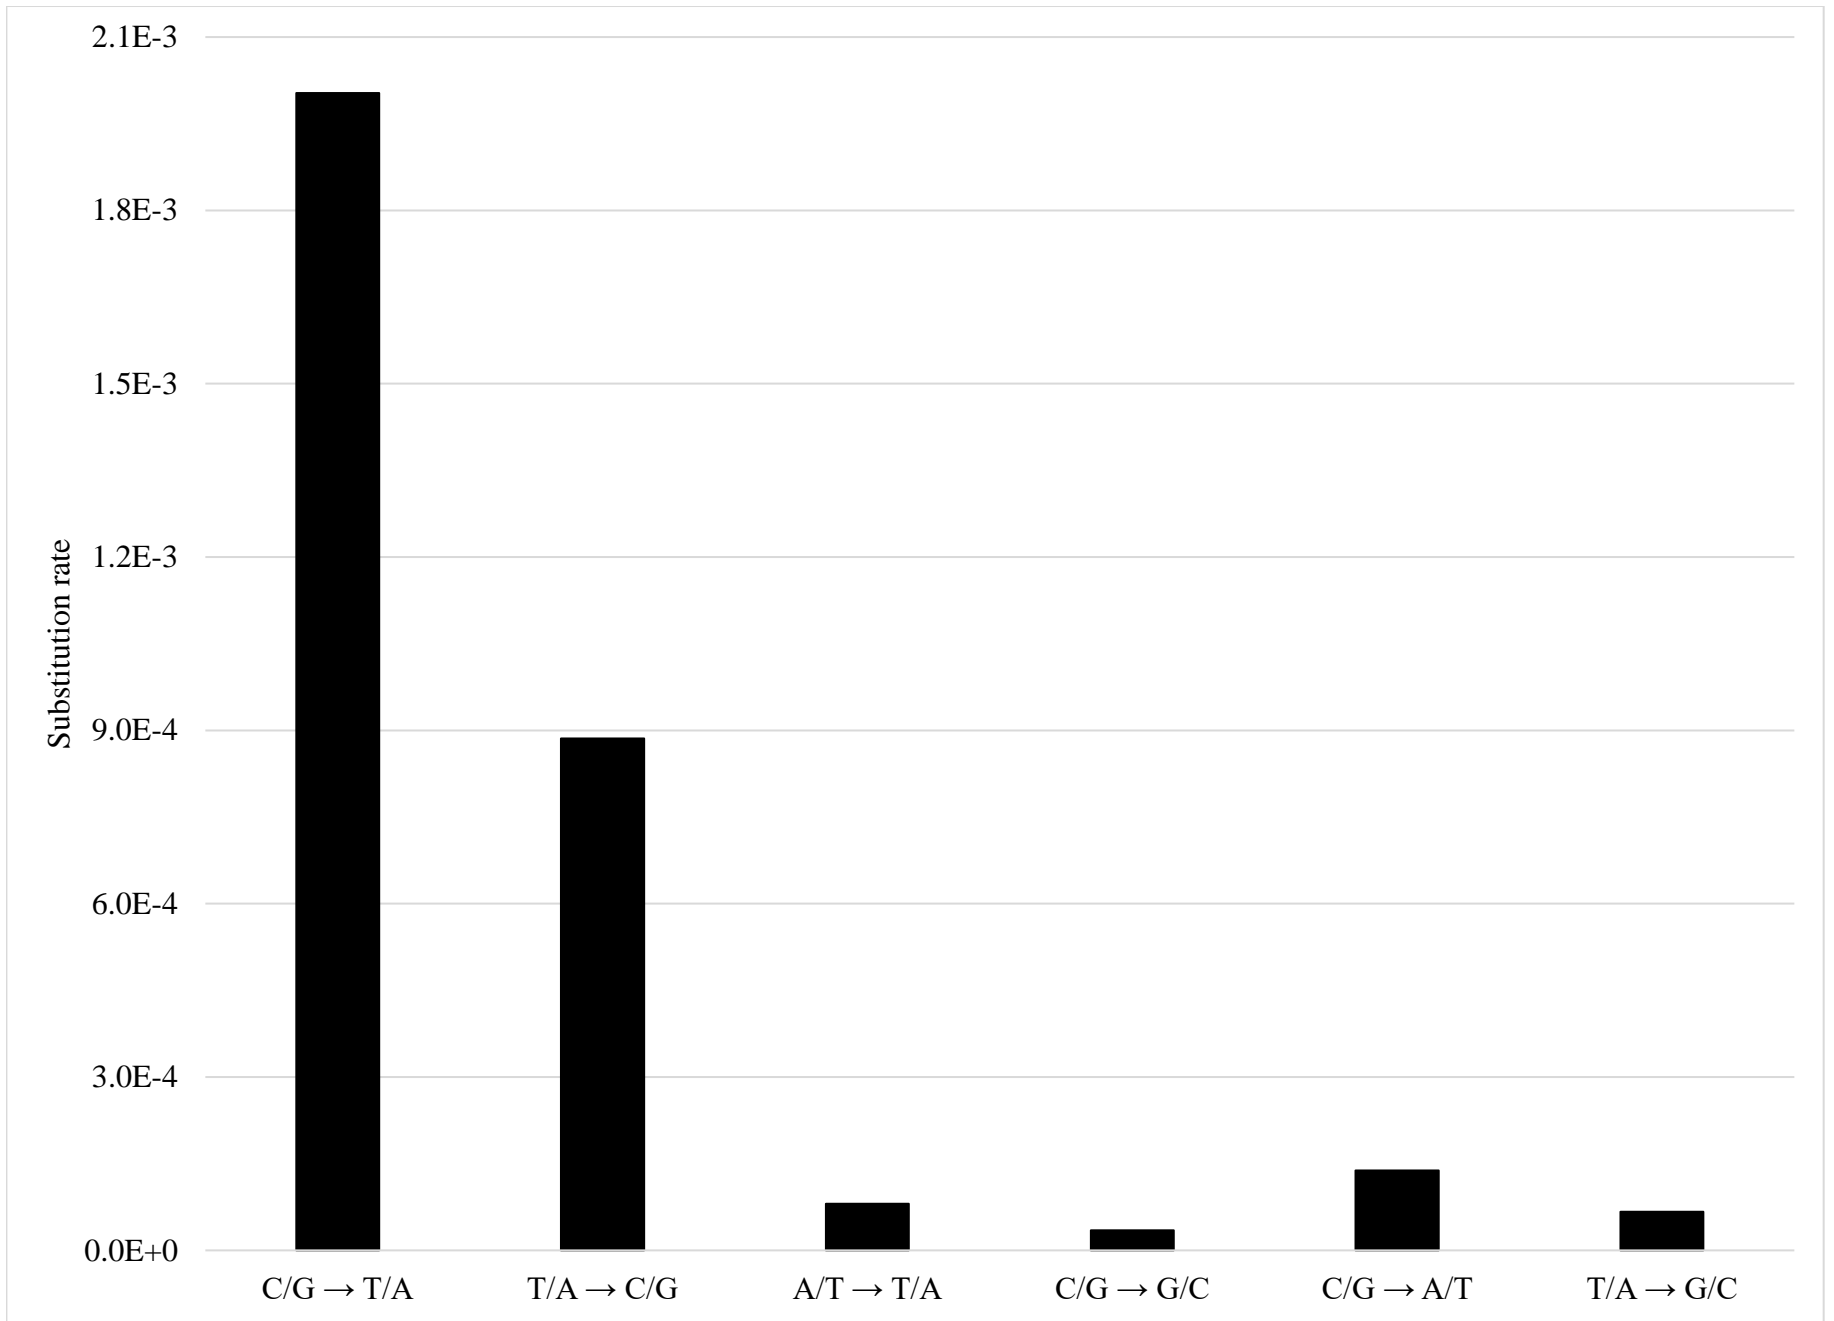

Supplement: Supplemental_figure_S2.pdf [file Supplemental_figure_S2.pdf]
